# Supplementary material for: BCAT1 affects mitochondrial metabolism independently of leucine transamination in activated human macrophages
Source: Oxford University Press journal article supplement (doi:10.1242/jcs.247957), 2020-11-04
Supplement: jcs247957supp.pdf [file jcs247957supp.pdf]

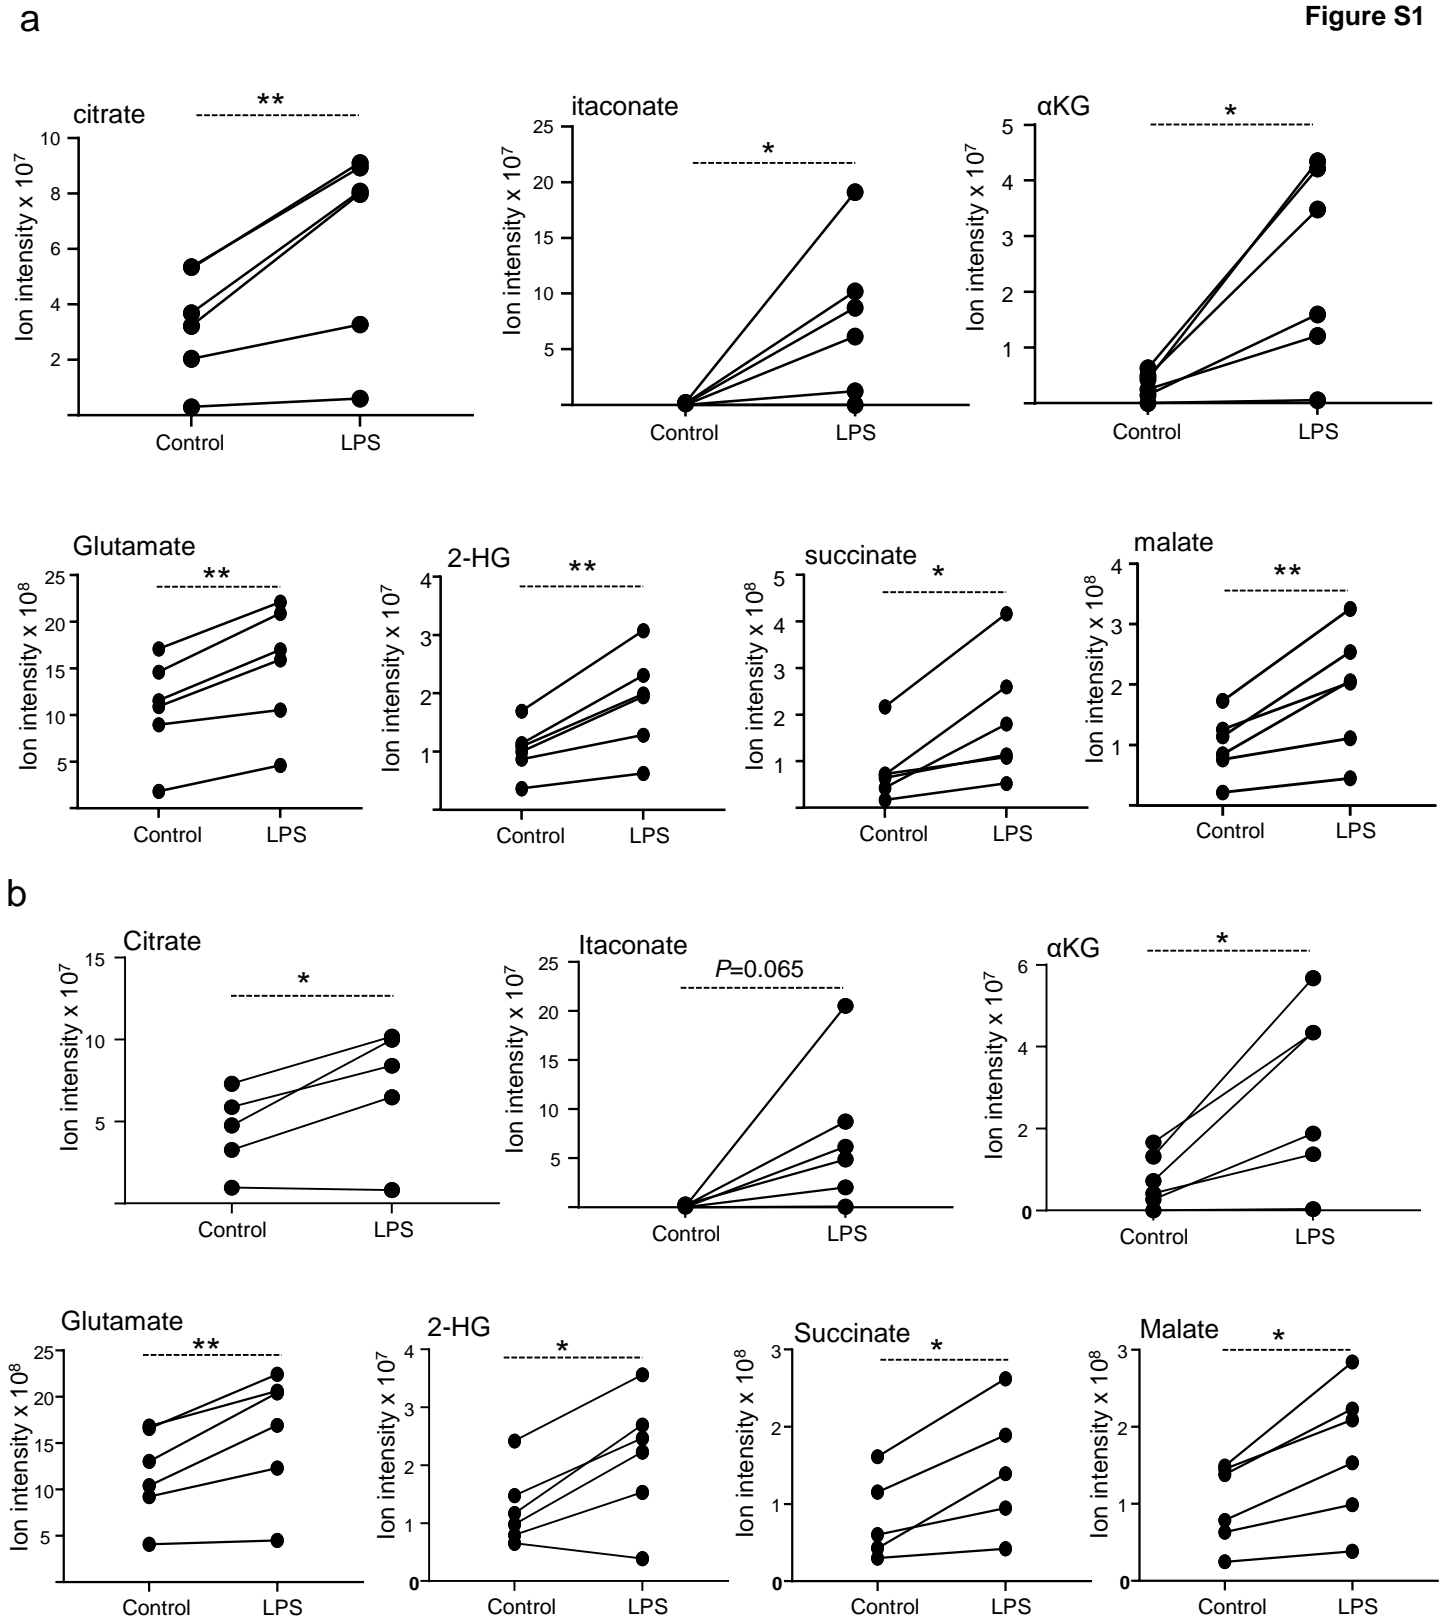

**Figure S1.** Early LPS activation increases the TCA cycle volume in human macrophages. LC-MS for itaconate, TCA cycle and  $\alpha$ KG-derived metabolites in control and LPS (8 hours)-treated hMDMs incubated either with  $[U-^{13}C]$ -glucose (**a**) or  $[U-^{13}C]$ -glutamine (**b**). Data points are the sum of M+0 and glucose (**a**) or glutamine-derived (**b**) isotopologues;  $n=6$  donors; significance was tested with paired t-test. \*,  $P<0.05$ ; \*\*,  $P<0.01$ .

Figure S2

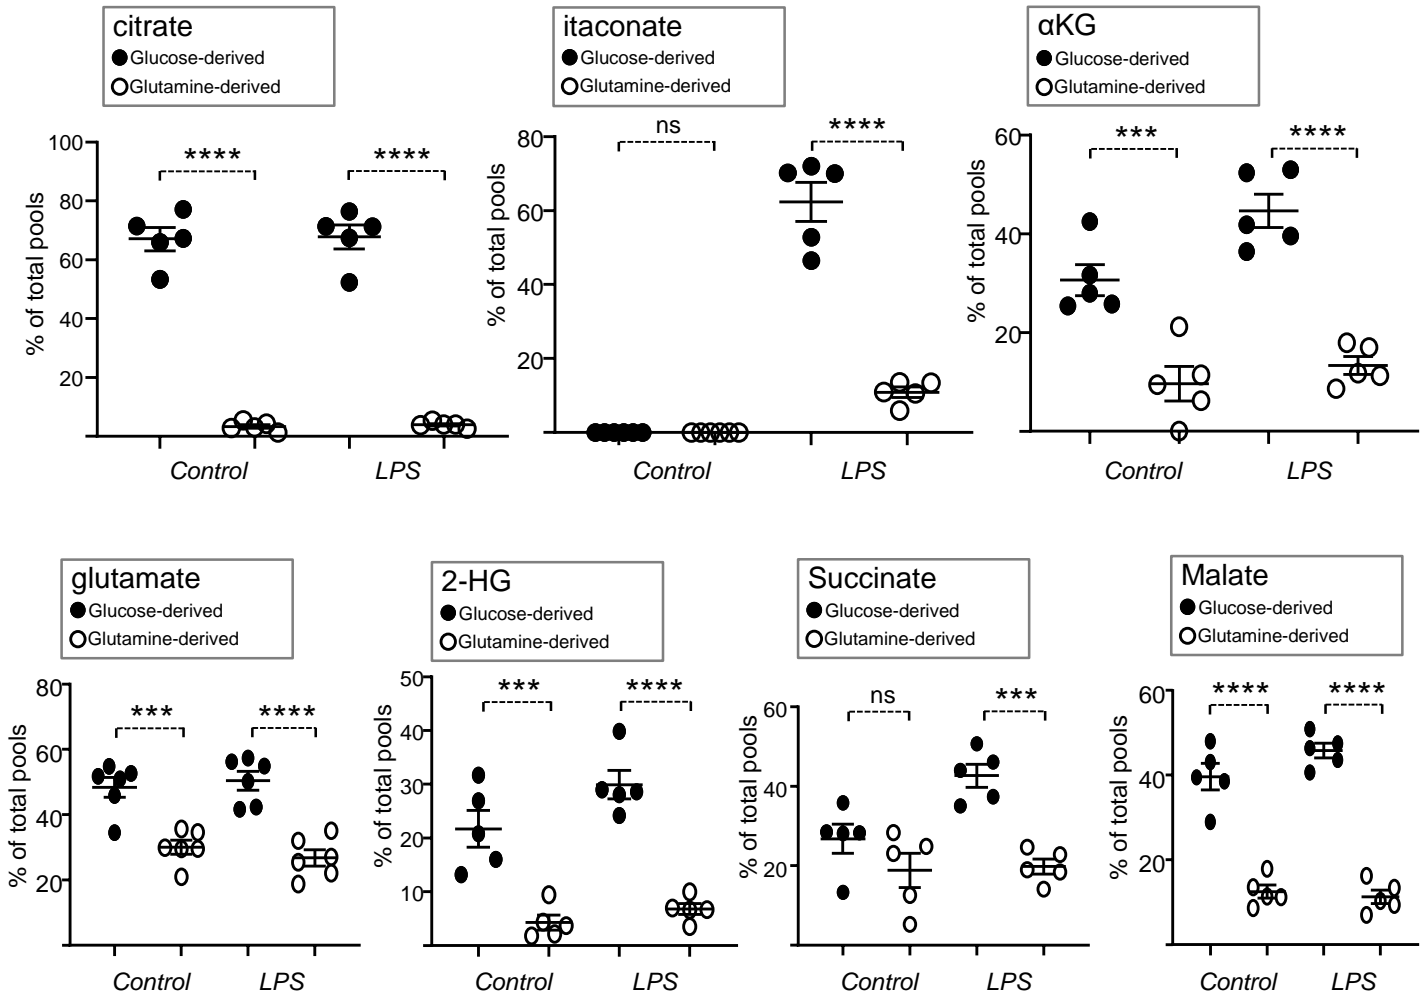

**Figure S2.** Glucose but not glutamine is a major contributor of the early increase in TCA cycle activity in human macrophages. LC-MS showing the glucose and glutamine-derived isotopologues (as percentage of total pools of metabolites) in control and LPS (8 hours)-treated hMDMs incubated either with [U]-<sup>13</sup>C-glucose (black circles) or with [U]-<sup>13</sup>C-glutamine (open circles) ; at least n=5 donors and significance was tested with one-way ANOVA followed by Tukey test; \*\*\*, P<0.001; \*\*\*\*, P<0.0001; ns, non-significant.

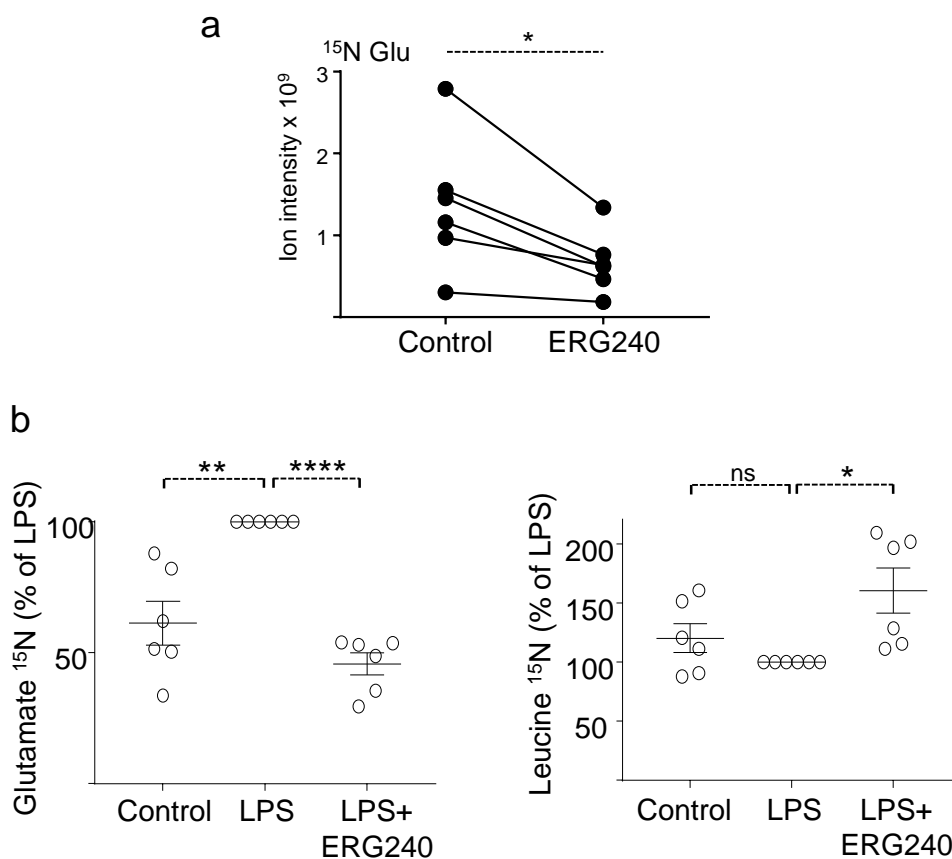

**Figure S3.** The leucine analogue ERG240 inhibits BCAT1 transamination activity and rescues its LPS-dependent up-regulation. **a.** LC-MS for [<sup>15</sup>N]-Glutamate in [<sup>15</sup>N]-Leucine incubated hMDMs in basal and ERG240-treated conditions. **b.** [<sup>15</sup>N]-Glutamate and [<sup>15</sup>N]-Leucine levels in basal (Control), LPS (8 hours; 100ng/ml) and LPS+ERG240 (8 hours) treatment conditions following incubation with [<sup>15</sup>N]-Leucine; n=6 donors and significance was tested with paired t-test (**a**) or by one sample t test (**b**); \*,P<0.05; \*\*, P<0.01; \*\*\*\*, P<0.0001; ns, non-significant.

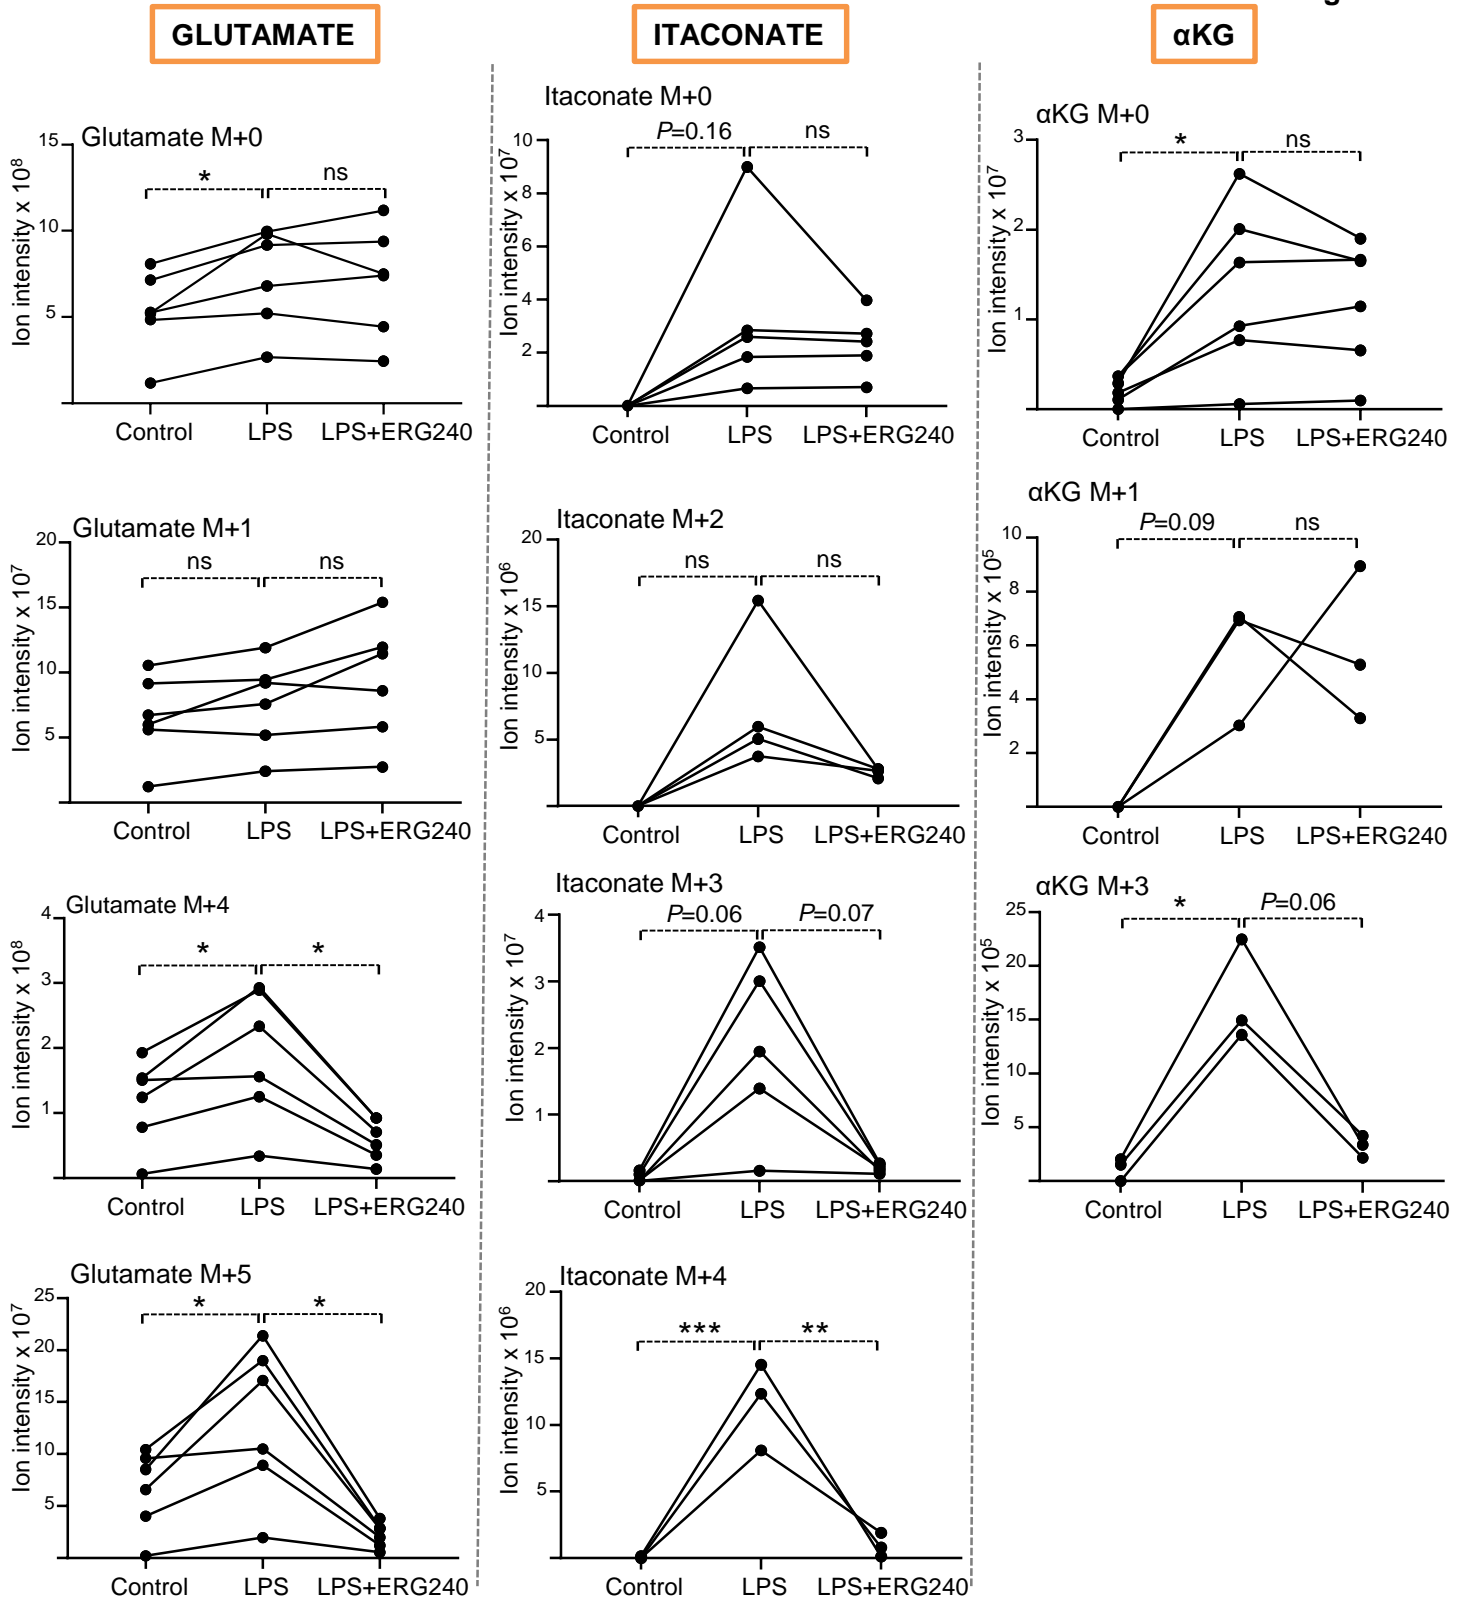

**Figure S4.** BCAT1 inhibition affects glucose-derived itaconate, αKG and glutamate levels in human macrophages. LC-MS for M+0 and glucose-derived glutamate (left column), itaconate (middle column) and αKG (right column) isotopologues in control (basal), LPS (8 hours) and LPS+ERG240 (8 hours)-treated hMDMs; at least n=3 donors; significance was tested with paired ANOVA followed by Tukey's test. \*,  $P<0.05$ , \*\*,  $P<0.01$ ; \*\*\*,  $P<0.001$ ; ns, non-significant.

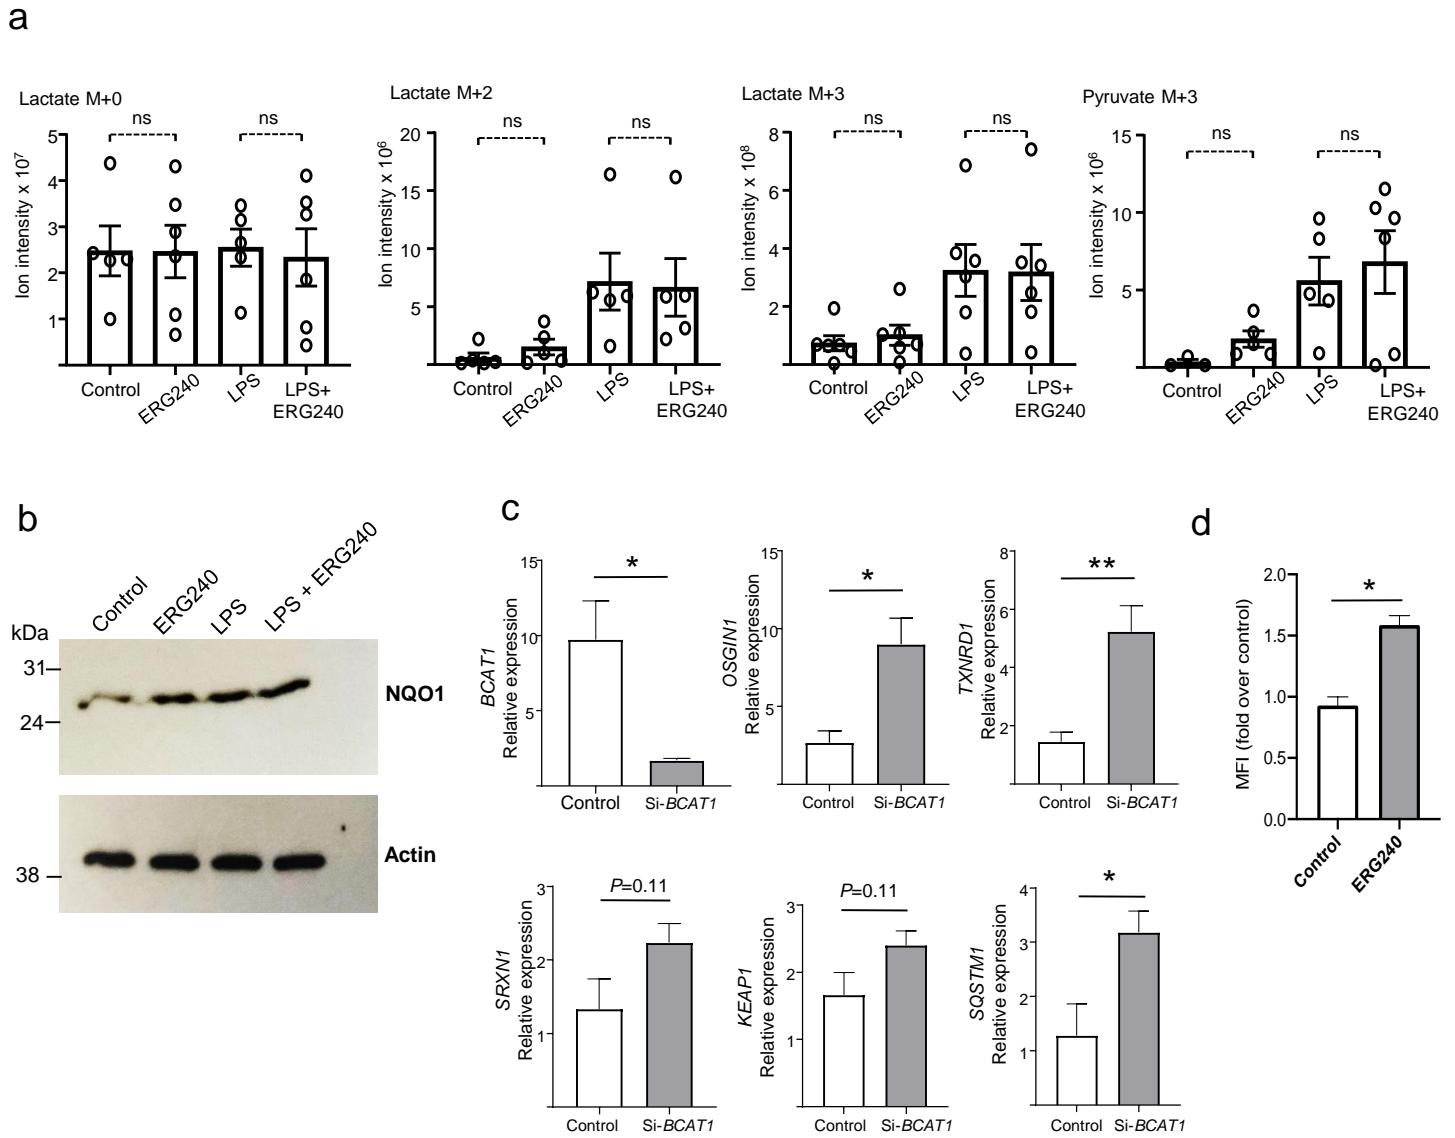

**Figure S5.** The effect of BCAT1 inhibition on glycolysis and NRF2 pathway in human macrophages. **a.** LC-MS for Lactate M+0, Lactate M+2, Lactate M+3 and Pyruvate M+3 in control (Ctrl), LPS (8h; 100ng/ml), ERG240 and LPS+ERG240-treated hMDMs. **b.** NQO1 Western Blot in control, ERG240, LPS and LPS+ERG240-treated hMDMs. **c.** qRT-PCR for *BCAT1* and NRF2 targets following *BCAT1* siRNA (si-*BCAT1*) or scrambled control (Control). The relative expression levels were normalized to *HPRT* expression levels. **d.** hMDMs were left untreated (Control) or treated 30 min with ERG240. Live cells were analysed by FACS and mean fluorescence intensity (MFI) was quantified as a measure of mitochondrial ROS production. (**a**); at least n=3 donors; significance was tested with one-way ANOVA followed by Tukey's test. (**b**) – (**d**); N=2 donors; significance was tested by t-test. \*, P<0.05; \*\*, P<0.01; ns, non-significant.
